# Supplementary material
Source: PubMed Central journal article supplement (PMC6086990)
Supplement: BPH-175-3594-s001.pdf [file BPH-175-3594-s001.pdf]

**MicroRNA-351-5p aggravates intestinal ischemia/reperfusion  
injury via targeting with MAPK13 and Sirt6**

Yupeng Hu, Xufeng Tao, Xu Han, Lina Xu, Lianhong Yin, Huijun Sun, Yan Qi,  
Youwei Xu, Jinyong Peng\*

*College of Pharmacy, Dalian Medical University, Western 9 Lvshunnan Road,  
Dalian 116044, China*

Corresponding author,

Dr. Jinyong Peng

College of Pharmacy

DalianMedicalUniversity

Dalian, China

Tel.: +86 411 8611 0411

Fax: +86 411 8611 0411

Email: [jinyongpeng2008@126.com](mailto:jinyongpeng2008@126.com)

**Table S1** The primers sequences of miRNAs in the present work.

| miRNAs                       | Primer sequence (5'-3')         |
|------------------------------|---------------------------------|
| rno-miR-21-3p-F              | CAACAGCAGTCGATGGGCT             |
| mmu-miR-21-3p-F              | CAACAGCAGTCGATGGGCT             |
| rno-miR-23a-5p-F             | GGGGTTCCTGGGGATGG               |
| mmu-miR-23a-5p-F             | GGGGTTCCTGGGGATGG               |
| rno-miR-144-3p-F             | CGGTACAGTATAGATGATGTACT         |
| mmu-miR-144-3p-F             | CGGTACAGTATAGATGATGTACT         |
| rno-miR-3572-F               | TTACTTGGCCCTTTTTTCCCA           |
| mmu-miR-3572-F               | TACTTGGCCCTTTTTTCCCA            |
| rno-miR-27a-5p-F             | AGGGCTTAGCTGCTTGAG              |
| mmu-miR-27a-5p-F             | AGGGCTTAGCTGCTTGAG              |
| rno-miR-294-F                | CTCAAATGGAGGCCCTATCT            |
| mmu-miR-294-F                | ACTCAAATGGAGGCCCTATCT           |
| rno-miR-142-3p-F             | GTGTAGTGTTTCCTACTTTATGGA        |
| mmu-miR-142-3p-F             | GTGTAGTGTTTCCTACTTTATGGA        |
| rno-miR-362-3p-F             | GAACACACCTGTTCAAGGATTC          |
| mmu-miR-362-3p-F             | GAACACACCTGTTCAAGGATTC          |
| rno-miR-351-5p-F             | ATCCCTGAGGAGCCCTTGA             |
| mmu-miR-351-5p-F             | ATCCCTGAGGAGCCCTTGA             |
| U6-F                         | Purchased from Sangon, Shanghai |
| General downstream primers R | Purchased from Sangon, Shanghai |
| miRNAs-RT                    | Oligo (dT)                      |

F: forward primer; R: reverse primer

**Table S2** The primer sequences used for real-time PCR assay in the present work.

| Gene                 | Forward primer (5'-3')  | Reverse primer (5'-3')   |
|----------------------|-------------------------|--------------------------|
| Rat $\beta$ -actin   | GACGGTCAGGTCATCACTATCG  | TAGTTTCATGGATGCCACAGGAT  |
| Rat IL-1 $\beta$     | CCTTGTGCAAGTGTCTGAAGC   | CCCAAGTCAAGGGCTTGGAA     |
| Rat TNF- $\alpha$    | TCAGTTCCATGGCCCAGAC     | GTTGTCTTTGAGATCCATGCCATT |
| Rat ICAM-1           | GCTTCTGCCACCATCACTGTGTA | ATGAGGTTCTTGCCCACCTG     |
| Mouse $\beta$ -actin | TGACGTTGACATCCGTAAG     | GAGGAGCAATGATCTTGATCT    |
| Mouse IL-1 $\beta$   | ATAAGCCCACTCTACACCT     | ATTGGCCCTGAAAGGAGAGA     |
| Mouse TNF- $\alpha$  | TATGGCCCAGACCCTCACA     | GGAGTAGACAAGGTACAACCCATC |
| Mouse ICAM-1         | AGGTGTGATATCCGGTAGAT    | CCTTCTAAGTGGTTGGAACA     |

**Table S3** The information of the antibodies used in the present work.

| Primary antibody   | Source | Dilution | Company                         |
|--------------------|--------|----------|---------------------------------|
| MAPK13             | Rabbit | 1: 1000  | Abcam, United States            |
| p-PKD1(ser916)     | Rabbit | 1: 1000  | CST, United States              |
| p-PKD1(ser744/748) | Rabbit | 1: 1000  | CST, United States              |
| PKD1               | Rabbit | 1: 500   | Abcam, United States            |
| NF-KB (p65)        | Rabbit | 1: 500   | Proteintech Group, Chicago, USA |
| Sirt6              | Rabbit | 1: 1000  | Proteintech Group, Chicago, USA |
| AMPK               | Rabbit | 1: 1000  | Arigo, TaiWan                   |
| p-AMPK             | Rabbit | 1: 2000  | Arigo, TaiWan                   |
| FoxO3 $\alpha$     | Rabbit | 1: 1000  | Proteintech Group, Chicago, USA |
| p-FoxO3 $\alpha$   | Rabbit | 1: 500   | Arigo, TaiWan                   |
| MnSOD              | Rabbit | 1: 2000  | Proteintech Group, Chicago, USA |
| CAT                | Rabbit | 1: 1000  | Proteintech Group, Chicago, USA |
| Bax                | Rabbit | 1: 1000  | Abcam, United States            |
| Cytc               | Rabbit | 1: 1000  | Proteintech Group, Chicago, USA |
| Apaf-1             | Rabbit | 1: 1000  | Proteintech Group, Chicago, USA |
| Cleaved-caspase3   | Rabbit | 1: 500   | Proteintech Group, Chicago, USA |
| Cleaved-caspase9   | Rabbit | 1: 500   | Proteintech Group, Chicago, USA |
| $\beta$ -actin     | Rabbit | 1: 1000  | Proteintech Group, Chicago, USA |

**Table S4** The up-regulated expression of miRNAs  
in II/R group compare with control

| Name                            | ID     | Fold change | P-value     |
|---------------------------------|--------|-------------|-------------|
| rno-miR-23a-5p                  | 42638  | 2.734879133 | 0.010593737 |
| rno-miR-300-5p                  | 42826  | 3.049145173 | 0.043799164 |
| rno-miR-878                     | 42645  | 1.810709635 | 0.251360607 |
| rno-miR-125b-1-3p               | 145838 | 6.347050188 | 0.195773314 |
| rno-miR-150-5p                  | 145678 | 2.048956985 | 0.053676579 |
| rno-miR-3068-5p                 | 148391 | 1.792258518 | 0.458021625 |
| rno-miR-665                     | 42770  | 1.826034186 | 0.225130773 |
| rno-miR-291a-5p                 | 31388  | 2.369978378 | 0.089644293 |
| rno-let-7b-3p                   | 42769  | 1.638152542 | 0.477990408 |
| rno-miR-92b-3p                  | 145897 | 2.201277299 | 0.086811087 |
| rno-miR-466c-3p                 | 148530 | 1.637742396 | 0.078294417 |
| rno-miR-21-3p                   | 17896  | 4.21429323  | 0.002140837 |
| rno-miR-344b-1-3p               | 148429 | 4.323989352 | 0.009628705 |
| rno-miR-450a-5p/rno-miR-450b-5p | 17835  | 2.180524417 | 0.153451697 |
| rno-miR-325-3p                  | 42706  | 1.893157411 | 0.294497916 |
| rno-miR-675-5p                  | 28547  | 2.089371379 | 0.184511444 |
| rno-miR-3560                    | 148569 | 2.346516154 | 0.230915331 |
| rno-miR-92b-5p                  | 42717  | 9.457667571 | 0.259853721 |
| rno-miR-204-3p                  | 42502  | 1.849583968 | 0.105749063 |
| rno-miR-1956-5p                 | 146082 | 9.925134772 | 0.158512405 |
| rno-miR-382-5p                  | 145643 | 1.666647821 | 0.267543449 |
| rno-miR-3592                    | 148337 | 2.047978777 | 0.277944169 |
| rno-miR-351-5p                  | 11235  | 2.244891508 | 0.041282927 |
| rno-miR-344b-3p                 | 148099 | 1.635664289 | 0.069215243 |
| rno-miR-345-5p                  | 11231  | 2.193935988 | 0.056338601 |
| rno-miR-874-3p                  | 42808  | 1.989212151 | 0.039983542 |
| rno-miR-486                     | 32946  | 2.047021351 | 0.090361755 |
| rno-miR-466b-5p                 | 42933  | 1.593142186 | 0.079235952 |
| rno-miR-329-5p                  | 148591 | 2.119036389 | 0.123659612 |
| rno-miR-144-3p                  | 29802  | 3.98295912  | 0.000258416 |
| rno-miR-377-5p                  | 42899  | 1.844353658 | 0.197368051 |
| rno-miR-1193-3p                 | 46251  | 1.593108656 | 0.120137222 |
| rno-miR-224-3p                  | 146163 | 2.838629455 | 0.098107354 |
| rno-miR-3572                    | 148584 | 2.684151041 | 0.001792659 |
| rno-miR-27a-5p                  | 17818  | 26.57068226 | 0.01462504  |
| rno-miR-465-3p                  | 148207 | 1.679405654 | 0.217991186 |
| rno-miR-344a-5p                 | 148046 | 1.612540627 | 0.475018298 |
| rno-miR-183-3p                  | 17953  | 2.168897657 | 0.001978906 |
| rno-miR-195-3p                  | 42723  | 1.917443534 | 0.101093394 |
| rno-miR-503-5p                  | 14288  | 1.735106555 | 0.125060961 |
| rno-miR-185-3p                  | 148401 | 2.362145325 | 0.125504636 |
| rno-miR-3552                    | 148476 | 2.659550292 | 0.225670749 |
| rno-miR-551b-5p                 | 148608 | 1.59953467  | 0.460103291 |
| rno-miR-505-5p                  | 42490  | 1.528396923 | 0.150167688 |

---

|                   |        |             |             |
|-------------------|--------|-------------|-------------|
| rno-miR-32-3p     | 29575  | 1.528920254 | 0.14780168  |
| rno-miR-331-5p    | 148385 | 2.660338355 | 0.426775751 |
| rno-miR-1843a-5p  | 169394 | 2.111315852 | 0.535196933 |
| rno-miR-294       | 42707  | 2.419531112 | 0.015271998 |
| rno-miR-487b-5p   | 148609 | 1.834127169 | 0.275602489 |
| rno-miR-451-5p    | 42866  | 3.975296323 | 7.23756E-06 |
| rno-miR-483-3p    | 42500  | 3.293365589 | 0.010974439 |
| rno-miR-330-3p    | 42606  | 1.727325115 | 0.283884697 |
| rno-miR-877       | 30033  | 1.557644392 | 0.271784192 |
| rno-miR-883-5p    | 42462  | 1.904958143 | 0.008506189 |
| rno-miR-125b-2-3p | 42845  | 4.484843442 | 0.008799017 |
| rno-miR-381-5p    | 148657 | 1.597047995 | 0.176511301 |
| rno-miR-122-3p    | 148334 | 1.550638638 | 0.407488795 |
| rno-miR-466b-3p   | 148483 | 1.611954496 | 0.130218672 |
| rno-miR-3573-3p   | 148348 | 1.967184769 | 0.002428074 |
| rno-miR-463-3p    | 42881  | 3.264263254 | 0.132121601 |
| rno-miR-485-3p    | 42694  | 3.029883153 | 0.044848684 |
| rno-miR-3568      | 148343 | 1.985882646 | 0.145584911 |
| rno-miR-187-5p    | 148512 | 2.770903164 | 0.168609146 |
| rno-miR-490-5p    | 17822  | 1.991405501 | 0.011697582 |
| rno-miR-3596c     | 148139 | 1.705739818 | 0.108815413 |
| rno-miR-758-5p    | 148068 | 1.916441922 | 0.054187114 |

---

**Table S5** The down-regulated expression of miRNAs  
in II/R group compare with control

| Name                            | ID     | Fold change | P-value     |
|---------------------------------|--------|-------------|-------------|
| rno-miR-31a-5p                  | 11052  | 0.614470487 | 0.211697973 |
| rno-miR-200b-3p                 | 147186 | 0.646328622 | 0.054220355 |
| rno-miR-138-1-3p                | 168937 | 0.524877091 | 0.257166426 |
| rno-miR-207                     | 11208  | 0.652378206 | 0.204372736 |
| rno-miR-382-3p                  | 169132 | 0.591695819 | 0.176712594 |
| rno-miR-27a-3p                  | 46483  | 0.566470658 | 0.080564681 |
| rno-miR-181c-5p                 | 42496  | 0.451581283 | 0.02680415  |
| rno-miR-29b-3p                  | 11040  | 0.614159735 | 0.078539897 |
| rno-miR-187-3p                  | 145637 | 0.665306341 | 0.034026333 |
| rno-miR-3596d                   | 148359 | 0.599897825 | 0.270921533 |
| rno-miR-101b-3p                 | 42953  | 0.656328409 | 0.051006129 |
| rno-miR-128-3p                  | 33902  | 0.598696936 | 0.064980305 |
| rno-miR-532-5p                  | 17624  | 0.607862349 | 0.035940214 |
| rno-miR-542-3p                  | 14272  | 0.623273096 | 0.118779443 |
| rno-miR-194-5p                  | 10988  | 0.595214023 | 0.002889869 |
| rno-miR-347                     | 42763  | 0.6359158   | 0.162422195 |
| rno-miR-203a-3p                 | 11004  | 0.633254657 | 0.00101281  |
| rno-miR-17-1-3p                 | 19588  | 0.650566765 | 0.007185019 |
| rno-miR-335                     | 11065  | 0.495462035 | 0.185665892 |
| rno-miR-192-5p                  | 17732  | 0.634386125 | 0.004653192 |
| rno-miR-505-3p                  | 42669  | 0.635652478 | 0.06872259  |
| rno-miR-336-5p                  | 11266  | 0.649015098 | 0.114221865 |
| rno-miR-342-3p                  | 32884  | 0.556354568 | 0.10093659  |
| rno-miR-25-3p                   | 42682  | 0.653439497 | 0.108497156 |
| rno-miR-28-3p                   | 145714 | 0.603164226 | 0.007451492 |
| rno-miR-140-5p                  | 4700   | 0.613948244 | 0.000545249 |
| rno-miR-142-3p                  | 10947  | 0.558221386 | 0.0009777   |
| rno-miR-363-5p                  | 27544  | 0.574993693 | 0.243754632 |
| rno-miR-29c-3p                  | 11041  | 0.647121125 | 0.001505393 |
| rno-miR-96-5p                   | 13147  | 0.660129915 | 0.08643274  |
| rno-miR-375-3p                  | 46918  | 0.639188667 | 0.071825559 |
| rno-let-7f-5p                   | 17752  | 0.583352051 | 0.083759491 |
| rno-miR-215                     | 11210  | 0.606772083 | 0.051654973 |
| rno-miR-181b-5p                 | 10972  | 0.630644786 | 0.209661493 |
| rno-miR-362-3p                  | 42474  | 0.606140014 | 0.006108155 |
| rno-miR-664-1-5p                | 148397 | 0.579008769 | 0.109827806 |
| rno-let-7a-1-3p/rno-let-7c-2-3p | 17888  | 0.551169728 | 0.077217099 |
| rno-miR-147                     | 168968 | 0.558105433 | 0.099534387 |
| rno-miR-322-5p                  | 13150  | 0.659006143 | 0.103586626 |
| rno-miR-760-5p                  | 42741  | 0.634840572 | 0.607114818 |

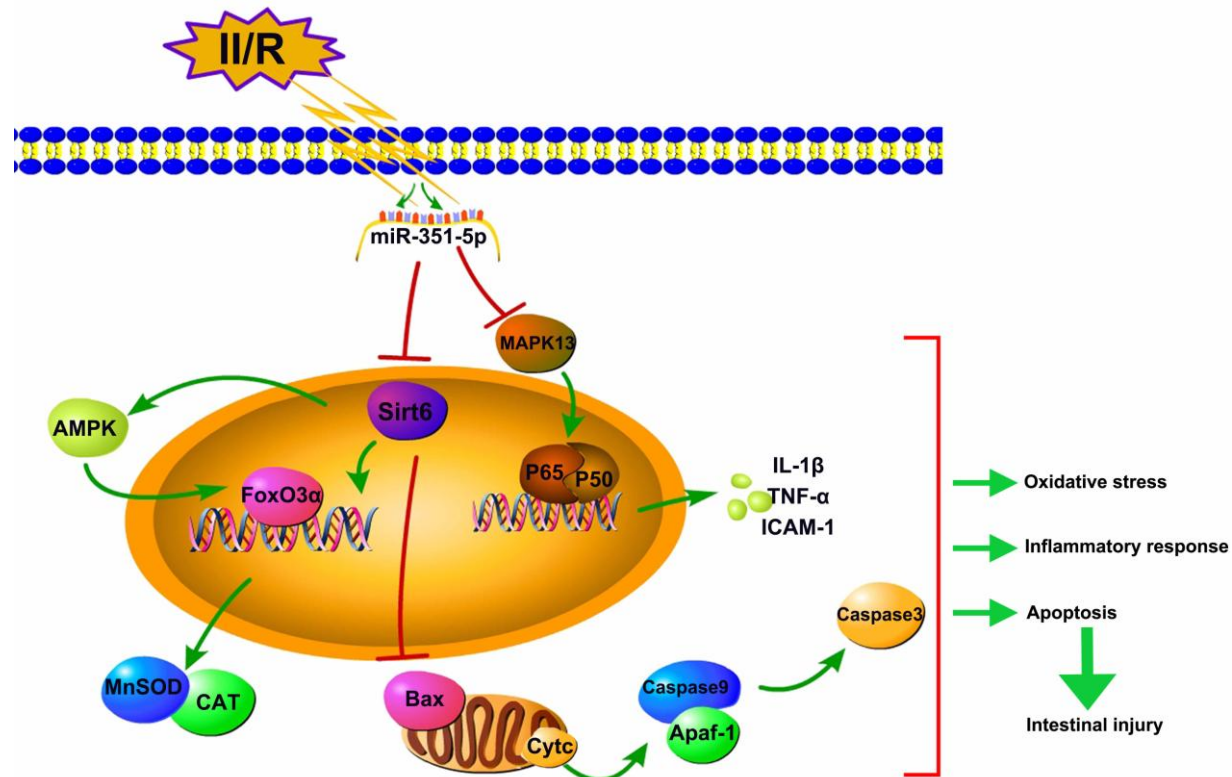

**Figure S1. Proposed signaling mechanism of miR-351-5p on II/R-induced intestinal injury.** miR-351-5p was selected as the target miRNA by microarrays assay, and Sirt6 and MAPK13 were the target genes of miR-351-5p. II/R significantly down-regulated the expression levels of Sirt6 and MAPK13 by increasing the level of miR-351-5p, up-regulated the levels of p-PKD1, NF- $\kappa$ B(p65) and inflammatory factors including IL-1 $\beta$ , IL-6, TNF- $\alpha$  and ICAM-1, increased p-FoxO3 $\alpha$  level via inhibiting AMPK, reduced MnSOD and CAT levels, and increased the levels of Bax, Cytc, Apaf-1, Cleaved- caspase3 and Cleaved-caspase9. MicroRNA-351-5p aggravated intestinal ischemia/ reperfusion injury by promoting intestinal mucosal oxidative stress, inflammation and apoptosis via targeting MAPK13 and Sirt6.
